# Supplementary material
Source: Springer Nature journal article supplement (https://www.springermedizin.de/resource/supplementary/12946_2009_125_MOESM9_ESM.pdf/9555616)
Supplement: MOESM9 [file 9555616]

|              | Within group contrasts for time periods                           |                                  |                                   |        |                                |                                              |                                      |                                            |
|--------------|-------------------------------------------------------------------|----------------------------------|-----------------------------------|--------|--------------------------------|----------------------------------------------|--------------------------------------|--------------------------------------------|
|              | 5-1'                                                              | 10-1'                            | 30-1'                             | 90-1'  | 2h-1'                          | 3h-1'                                        | 4h-1'                                | 6-1'                                       |
| <b>Shunt</b> | 0                                                                 | 0                                | 0                                 | 0      | 0                              | PTMA<br>SCYL 2                               |                                      | SCYL 2<br>MAPK8IP2                         |
| <b>Sham</b>  | KIF 4A<br>NME 1<br>MAPK8IP2<br>UBE2C<br>UBE2M<br>IGFBP3<br>MAPK13 | CDK 5<br>UBE2M<br>UBE2JI<br>BTG3 | NME1<br>MAPK13<br>UBE2C<br>UBE2JI | UBE2JI | MAPK8IP2<br>UBE2C<br>Bcl-rambo | NME1<br>Bcl-rambo<br>MAPK13<br>MAPK6<br>MDM2 | UBE2C<br>Bcl-rambo<br>MAPK13<br>BTG3 | KIF1B<br>SCYL 2<br>MAPK6<br>MAPK13<br>MDM2 |

**Table 2. Differentially expressed genes regulating cell cycle and apoptosis.**

**Upregulated genes,**
 **Downregulated genes**
